# Supplementary material for: Two New Putative Plant Viruses from Wood Metagenomics Analysis of an Esca Diseased Vineyard
Source: PubMed Central journal article supplement (PMC7412230; doi:10.3390/plants9070835), 2020-07-03
Supplement: plants-09-00835-s001.pdf [file plants-09-00835-s001.pdf]

1 *Communication*

## 2 **Two new** putative plant viruses from wood 3 **metagenomics analysis of esca diseased grapevines**

4 **Nadia Bertazzon<sup>1</sup>, Walter Chitarra<sup>1,2\*</sup>, Elisa Angelini<sup>1</sup> and Luca Nerva<sup>1,2\*</sup>**

5 <sup>1</sup> Council for Agricultural Research and Economics – Research Centre for Viticulture and Enology CREA-  
6 VE, Via XXVIII Aprile 26, 31015 Conegliano (TV), Italy

7 <sup>2</sup> National Research Council of Italy - Institute for Sustainable Plant Protection CNR-IPSP, Strada delle Cacce  
8 73, 10135 Torino, Italy

9 \* Correspondence: walter.chitarra@crea.gov.it; (W.C.)

10 luca.nerva@crea.gov.it; (L.N.)

11 Received: date; Accepted: date; Published: date

12 **Abstract:** The concept of plant as a holobiont is now spreading among the scientific community and  
13 the importance to study plant-associated microorganisms is becoming more and more necessary.  
14 Along with bacteria and fungi, also viruses can play important roles during the holobiont-  
15 environment interactions. In grapevine, viruses are studied mainly as pathological agents, and a  
16 huge number of species (more than 80) are known to be able to replicate inside its tissues. In this  
17 study two new viral species associated with grape wood tissues are presented, one of which belongs  
18 to the *Potyviridae* family and one to the *Bunyvirales* order. Due to the ability of potyviruses to  
19 enhance heterologous virus replication, it will be important to assess the presence of such a virus in  
20 the grapevine population to understand its ecological role. Furthermore, the association of the cogu-  
21 like virus with esca symptomatic samples suggests a possible involvement in syndrome  
22 development as also demonstrated for other viruses belonging to the same clade.

23 **Keywords:** grapevine, potyvirus, bunyavirus, coguvirus, esca disease

24  
25

# 26 **Supplementary Information**

27  
28

**Table S1.** List of primers (and a probe) used for detection of the new viruses we identified.

| Primer name                            | Used for | Primer sequence         | Target virus |
|----------------------------------------|----------|-------------------------|--------------|
| VvPV1_1_For                            | qRT-PCR  | GCCGCCACACTTGTCTACGT    | GaPIV1       |
| VvPV1_1_Rev                            | qRT-PCR  | TGAAGCGAGGTTGGTCAGGA    | GaPIV1       |
| VvPV1_1_Probe                          | qRT-PCR  | GCTGACACTATCTTTCCACGC   | GaPIV1       |
| VvPV1_264bpFor                         | RT-PCR   | CACCTGTGACGAGATGGGCG    | GaPIV1       |
| VvPV1_264bpRev                         | RT-PCR   | TCCACATTTGTATCCCCAATGCA | GaPIV1       |
| VvBV1_For                              | qRT-PCR  | AGCCAACCACACCACCACTG    | GaCIV4       |
| VvBV1_Rev                              | qRT-PCR  | GATTGTTCGGGGCGGCTGAA,   | GaCIV4       |
| VvBV1_340bpRev (to be used with VvBV1) | RT-PCR   | GGTGCGTCTGGTTCTGCTCT    | GaCIV4       |

29

30  
31  
32

**Table S2.** Number of reads and average depth for each virus and genome segment detected in the 6 analyzed samples.

|               | As1          |           | As2          |           | As3          |           | Sy1          |           | Sy2          |           | Sy3          |           |
|---------------|--------------|-----------|--------------|-----------|--------------|-----------|--------------|-----------|--------------|-----------|--------------|-----------|
|               | Reads number | Av. Depth | Reads number | Av. Depth | Reads number | Av. Depth | Reads number | Av. Depth | Reads number | Av. Depth | Reads number | Av. Depth |
| GaCIV4 - RNA1 | n.d.         |           | n.d.         |           | n.d.         |           | 6692         | 88        | 3253         | 44        | 4638         | 63        |
| GaCIV4 - RNA2 | n.d.         |           | n.d.         |           | n.d.         |           | 2210         | 95        | 1069         | 48        | 2232         | 99        |
| GaCIV4 - RNA3 | n.d.         |           | n.d.         |           | n.d.         |           | 809          | 49        | 414          | 25        | 967          | 58        |
| GaPIV1        | 4566         | 41        | 5280         | 48        | 3619         | 33        | 20895        | 191       | 6617         | 61        | 11942        | 108       |

33  
34

n.d.: not detected

35  
36

**Figure S1.** Genome representations for both Grapevine associated poty-like virus 1 (GaPIV1) and Grapevine associated cogu-like virus 4 (GaCIV4). The blue lines represent open reading frames (ORFs), light blue lines are the CDD/SPARCLE recognized domains and arrows represent the reading sense.

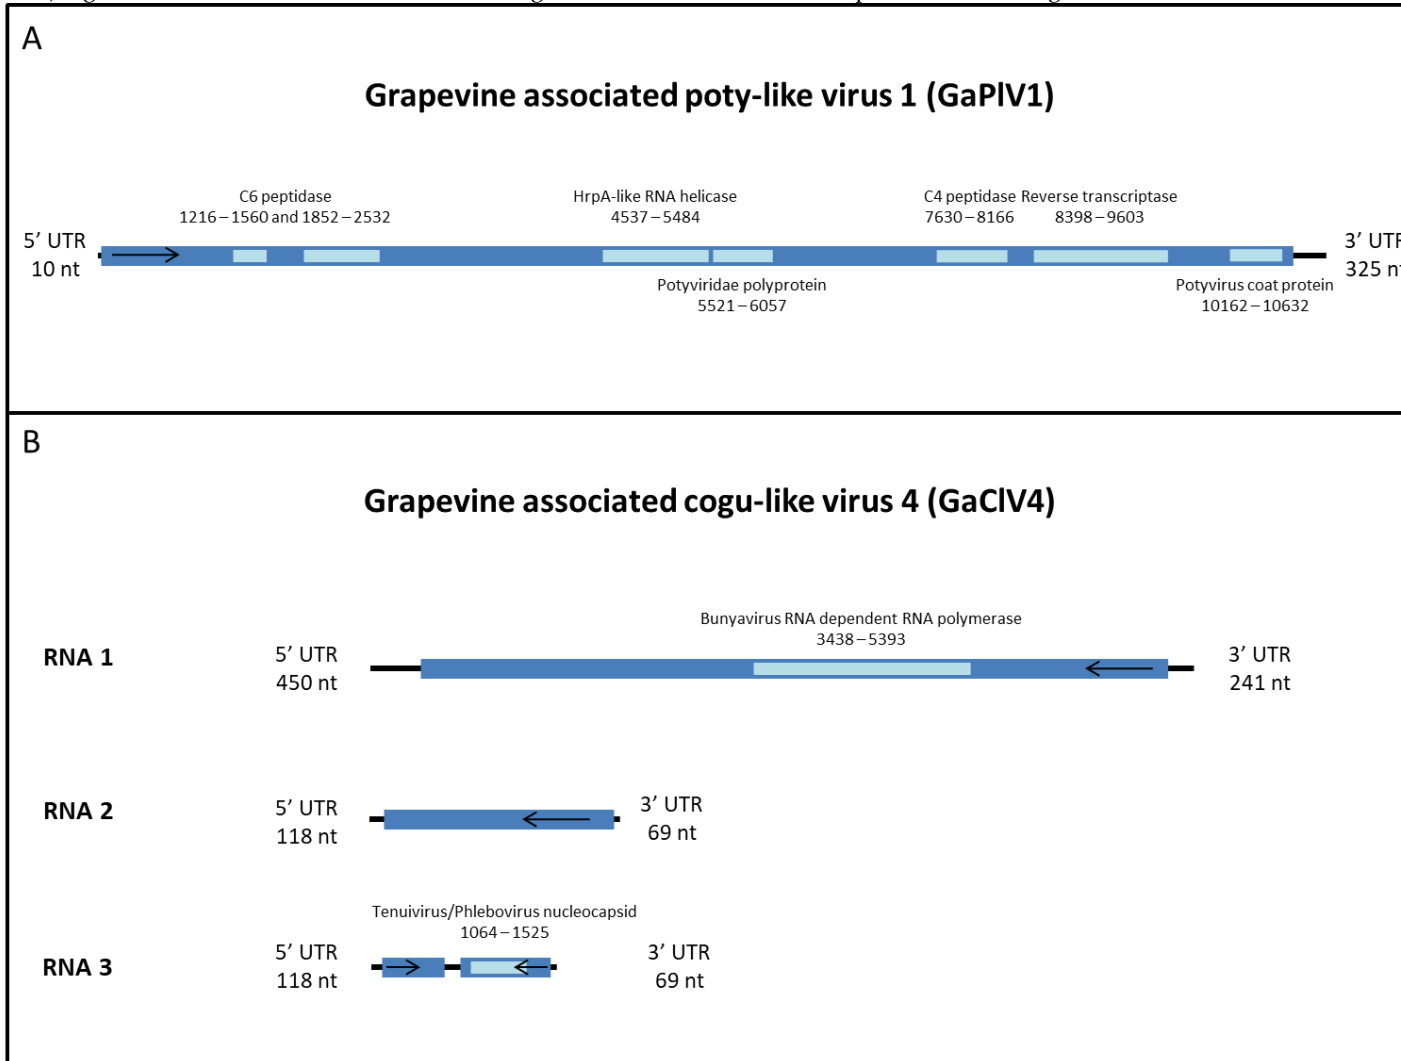

37

38

39

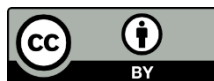

© 2020 by the authors. Submitted for possible open access publication under the terms and conditions of the Creative Commons Attribution (CC BY) license (<http://creativecommons.org/licenses/by/4.0/>).

40
